# Supplementary material for: Actin cytoskeleton and complex cell architecture in an Asgard archaeon
Source: Springer Nature journal article supplement (doi:10.1038/s41586-022-05550-y), 2022-12-21
Supplement: 41586_2022_5550_MOESM1_ESM.pdf [file 41586_2022_5550_MOESM1_ESM.pdf]

**Supplementary information**

---

**Actin cytoskeleton and complex cell architecture in an Asgard archaeon**

---

In the format provided by the authors and unedited

Source Data Fig. 5f

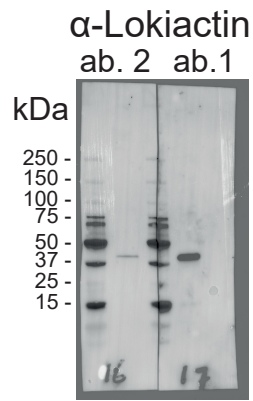

Supplementary Figure 1. Uncropped Western blot shown in Fig. 5f.
